# Supplementary material for: Impact of Neuroimaging Modalities and Grading Systems on Prognostic Accuracy for Neurodevelopmental Outcomes in Preterm Infants with Intraventricular Hemorrhage
Source: Research Square preprint supplement (doi:10.21203/rs.3.rs-8424988/v1), 2026-01-16
Supplement: Supplementary file 1 [file d7ead1f81f54eb187cfb5af9.docx]

**Supplementary material:**

**Table 1 suppl.: Clinical characteristics stratified for mild IVH and severe IVH**

| Clinical characteristics  (mean±SD, median (IQR), or n (%)) | IVH  (n=85) | mild IVH  (n=68) | Severe IVH  (n=17) | p |
| --- | --- | --- | --- | --- |
| Weeks of gestation at birth –weeks | 26.49±2.57 | 26.51±2.59 | 26.41±2.57 | 0.884 |
| Birthweight –g | 952.35±409.73 | 944.12±403.70 | 985.29±445.70 | 0.732 |
| Birthweight <1000 g | 55(64.7) | 44(64.7) | 11(64.7) | 1.000 |
| Percentile (%) | 37.95±24.46 | 37.12±23.84 | 41.24±27.27 | 0.575 |
| Male sex | 41(48.2) | 34(50.0) | 7(41.2) | 0.593 |
| Delivery |  |  |  | 0.235 |
| Vaginal | 8(9.4) | 6(8.8) | 2(11.8) |  |
| Primary Cesarean section | 58(68.2) | 49(72.1) | 9(52.9) |  |
| Secondary Cesarean section | 19(22.4) | 13(1.1) | 6(35.3) |  |
| Multiple birth | 25(29.4) | 19(27.9) | 6(35.3) | 0.563 |
| PPROM –h (median+IQR) |  |  |  |  |
| Median(IQR) | 0(0 – 0) | 0(0 – 1) | 0 (0 – 0) | 0.395 |
| Mean±SD | 67.91±212.51 | 60.69±169.44 | 95.44±336.06 | 0.694 |
| SGA | 13(15.5) | 10(14.9) | 3(17.7) | 0.721 |
| Admission temperature (°C) | 36.95±0.65 | 37.00±0.65 | 36.78±0.64 | 0.233 |
| Catecholamine treatment | 14(16.5) | 9(13.2) | 5(29.4) | 0.143 |
| APGAR at 10 minutes | 8.07±1.00 | 8.15±0.92 | 7.76±1.25 | 0.251 |
| Sepsis | 44(51.8) | 35(51.5) | 9(52.9) | 1.000 |
| PDA | 70(82.4) | 58(85.3) | 12(70.6) | 0.168 |
| Red-blood-cell-transfusion |  |  |  |  |
| Median(IQR) | 1(0 – 4) | 1(0 – 3) | 4(1 – 4) | 0.104 |
| Mean±SD | 2.61±3.03 | 2.44±3.15 | 3.29±2.44 | 0.236 |
| Ventilation (invasive, d) |  |  |  |  |
| Median(IQR) | 6(0 – 15) | 4(0 – 14) | 10(6 – 17) | 0.104 |
| Mean±SD | 10.68±14.40 | 10.35±15.40 | 12.00±9.68 | 0.586 |
| CPAP (d) | 33.98±24.80 | 32.65±24.14 | 39.29±27.40 | 0.370 |
| ROP | 51(60.0) | 39(57.4) | 12(70.6) | 0.411 |
| BPD (36 weeks of GA) | 26(30.6) | 20(29.4) | 6(35.3) | 0.769 |
| surgery | 34(40.0) | 24(35.3) | 10(58.8) | 0.099 |
| NEC | 7(8.2) | 5(7.4) | 2(11.8) | 0.623 |
| Cognitive Outcome | N=63 | N=50 | N=13 |  |
| Median (IQR) | 85 (72 – 103) | 89(75 – 105) | 75(62 – 86) | 0.064 |
| Mean±SD | 85.69±21.97 | 88.19±22.26 | 76.08±18.55 | 0.057 |
| <85 | 27(40.3) | 19(38.0) | 8(61.5) | 0.208 |
| ≥85 | 36(42.9) | 31(62.0) | 5(38.5) |  |
| Motor Outcome | N=56 | N=46 | N=10 |  |
| Median (IQR) | 77.5 (56 – 99) | 83 (57 – 100) | 66 (50 – 77) | 0.083 |
| Mean±SD | 7.00±23.70 | 81.63±24.58 | 66.90±14.63 | 0.020 |
| <85 | 32(57.1) | 24(52.2) | 8(80.0) | 0.162 |
| ≥85 | 24(42.9) | 22(47.8) | 2(20.0) |  |

BPD: bronchopulmonary dysplasia, CPAP: continuous positive airway pressure, NEC: necrotizing enterocolitis, PDA: persistent ductus arteriosus, PPROM: preterm premature rupture of the membranes, ROP: retinopathy of prematurity, SGA: small for gestational age, significant: p<0.05.

**Table 2 suppl.: Association between brain injuries stratified by cranial ultrasound and cMRI and neurodevelopmental outcomes**

| **Brain Injuries** | **cUS Volpe**  **(n)** | **cUS Volpe**  **(mean±SD)** | **cUS Papile**  **(n)** | **cUS Papile**  **(mean±SD)** | **cMRI**  **(n)** | **cMRI**  **(mean±SD)** |
| --- | --- | --- | --- | --- | --- | --- |
| **a) cognitive outcome** |  |  |  |  |  |  |
| IVH |  |  |  |  |  |  |
| 0 | 296 | 93.95±19.19 | 287 | 94.42±18.68 | 281 | 94.31±18.67 |
| 1 | 20 | 88.30±21.26 | 12 | 91.75±19.08 | 22 | 94.95±20.70 |
| 2 | 18 | 86.36±21.54 | 35 | 83.67±23.78 | 29 | 82.60±21.99 |
| 3 | 9 | 79.56±14.33 | 9 | 79.56±14.33 | 12 | 76.17±19.37 |
|  |  |  |  |  |  |  |
| **b) motor outcome** |  |  |  |  |  |  |
| IVH |  |  |  |  |  |  |
| 0 | 265 | 89.17±18.73 | 257 | 89.68±18.39 | 252 | 89.73±17.91 |
| 1 | 19 | 84.47±22.75 | 12 | 90.33±20.69 | 21 | 91.48±26.45 |
| 2 | 16 | 81.44±21.88 | 31 | 77.61±22.32 | 26 | 72.88±19.60 |
| 3 | 7 | 63.14±13.63 | 7 | 63.14±13.63 | 9 | 67.56±15.36 |

CUS: cranial ultrasound, IVH: intraventricular hemorrhage, significant: p<0.05.
